# Supplementary material
Source: PubMed Central journal article supplement (PMC3042311)
Supplement: Supp_Data.pdf [file Supp_Data.pdf]

## Supplementary Data

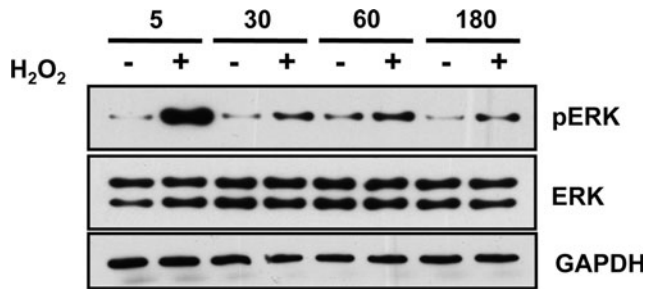

**SUPPLEMENTARY FIG. S1.** Exogenous H<sub>2</sub>O<sub>2</sub> induced rapid activation of ERK in *Anopheles stephensi* cells. ASE cells were treated with PBS or with 500 μM H<sub>2</sub>O<sub>2</sub> for 5, 30, 60, and 180 min. Protein samples were collected at indicated times for western blot analysis. Blots are representative of three independent experiments. ERK, extracellular signal-regulated kinase; H<sub>2</sub>O<sub>2</sub>, hydrogen peroxide; PBS, phosphate-buffered saline.

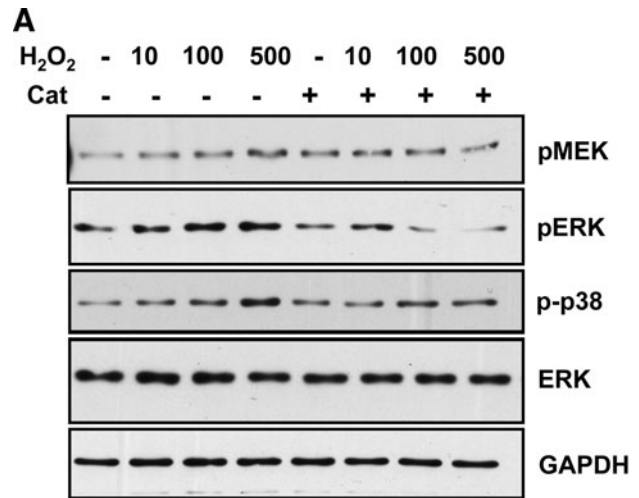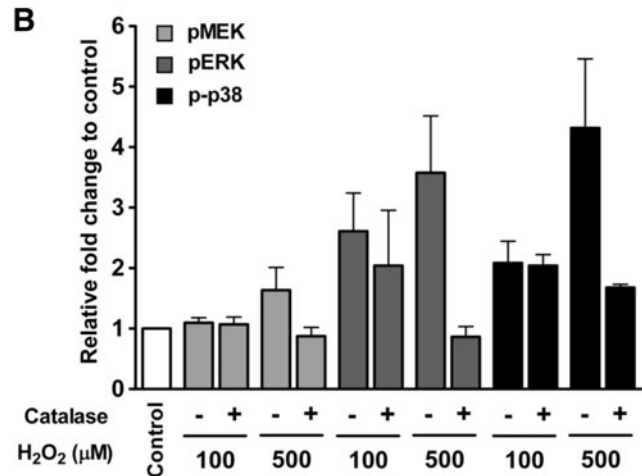

**SUPPLEMENTARY FIG. S2.** Exogenous H<sub>2</sub>O<sub>2</sub> activated MEK, ERK, and p38 mitogen-activated protein kinase phosphorylation in *Anopheles gambiae* 4a3B cells. (A) H<sub>2</sub>O<sub>2</sub> dose dependently induced MEK, ERK, and p38 phosphorylation in 4a3B cells. Cells were treated with PBS or with increasing concentrations of H<sub>2</sub>O<sub>2</sub> for 15 min. For catalase treatment, cells were pretreated with catalase at 200 units/ml for 40 min before H<sub>2</sub>O<sub>2</sub>. Blots are representative of two independent experiments. (B) Relative fold increases of pMEK, pERK, and p-p38 were normalized to total ERK (for pERK only) or GAPDH and are shown relative to PBS controls. MEK, mitogen activated protein kinase kinase.

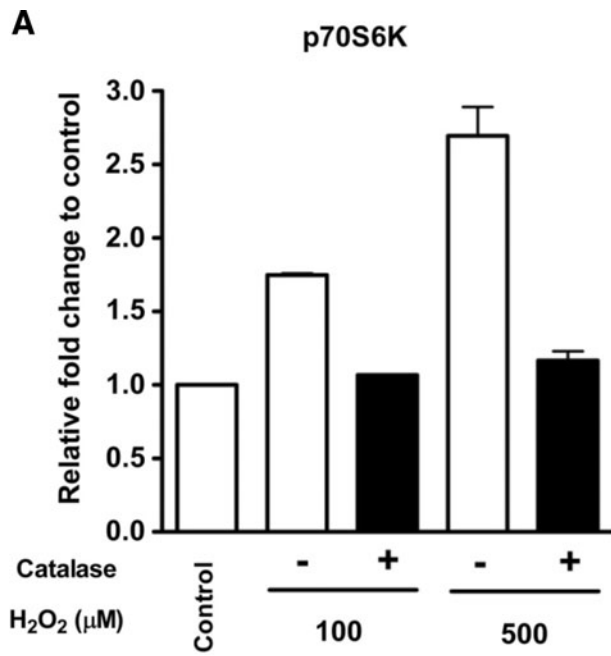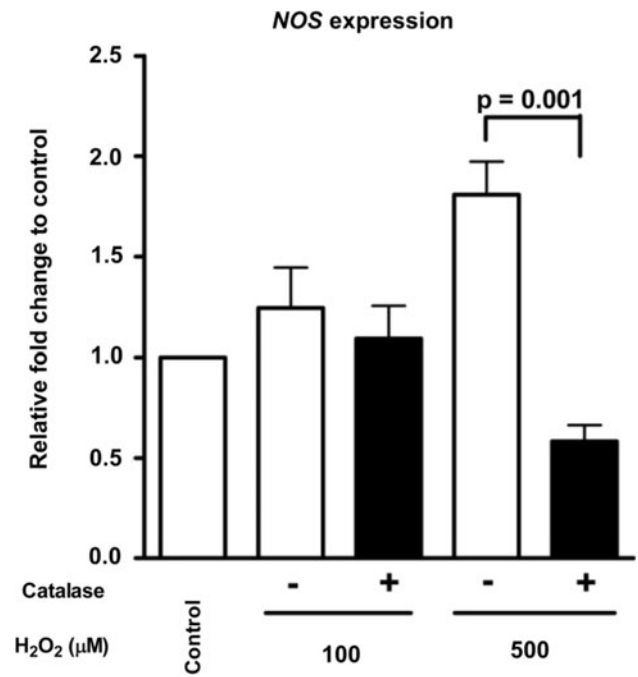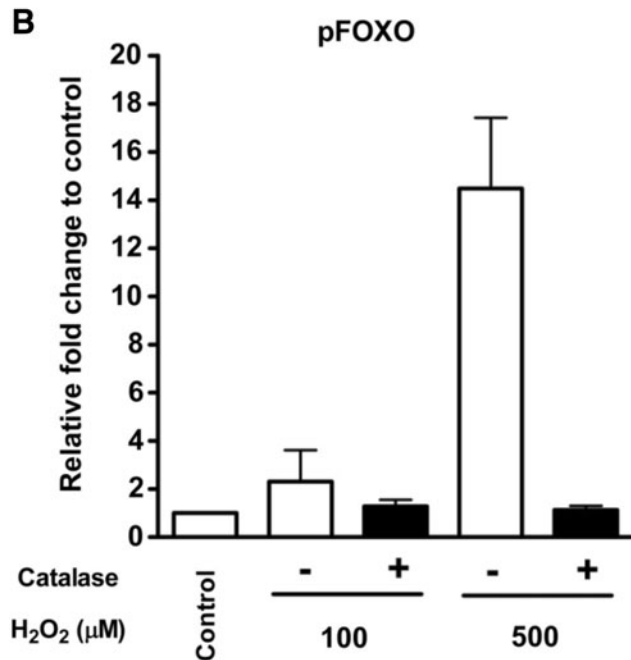

**SUPPLEMENTARY FIG. S4.** H<sub>2</sub>O<sub>2</sub> induced NOS expression in *A. gambiae* cells. 4a3B cells were treated with PBS as a control, with 100 or 500 μM H<sub>2</sub>O<sub>2</sub> alone or pretreated with 200 units/ml catalase for 40 min before H<sub>2</sub>O<sub>2</sub> treatment. NOS gene expression was analyzed by quantitative reverse transcriptase–polymerase chain reaction at 24 h post-treatment. Fold inductions of NOS relative to control from three independent experiments are represented as mean ± SEMs. Pairwise comparisons of treatments were analyzed by Student's *t*-test ( $\alpha = 0.05$ ). Significant differences within treatment pairs are indicated. NOS, nitric oxide synthase.

**SUPPLEMENTARY FIG. S3.** H<sub>2</sub>O<sub>2</sub> induced FOXO and p70S6K phosphorylation in ASE cells. Increasing doses of H<sub>2</sub>O<sub>2</sub> activated FOXO and p70S6K phosphorylation in ASE cells and pretreatment with catalase at 200 units/ml for 40 min before H<sub>2</sub>O<sub>2</sub> treatment reduced this phosphorylation. Fold increases of pFOXO (**A**) and p-p70S6K (**B**) from Figure 5E and an additional replicate were normalized to GAPDH and are shown relative to PBS treated control cells. Data are represented as means ± SEMs from two independent experiments. FOXO, forkhead box O1; SEM, standard error of the mean.

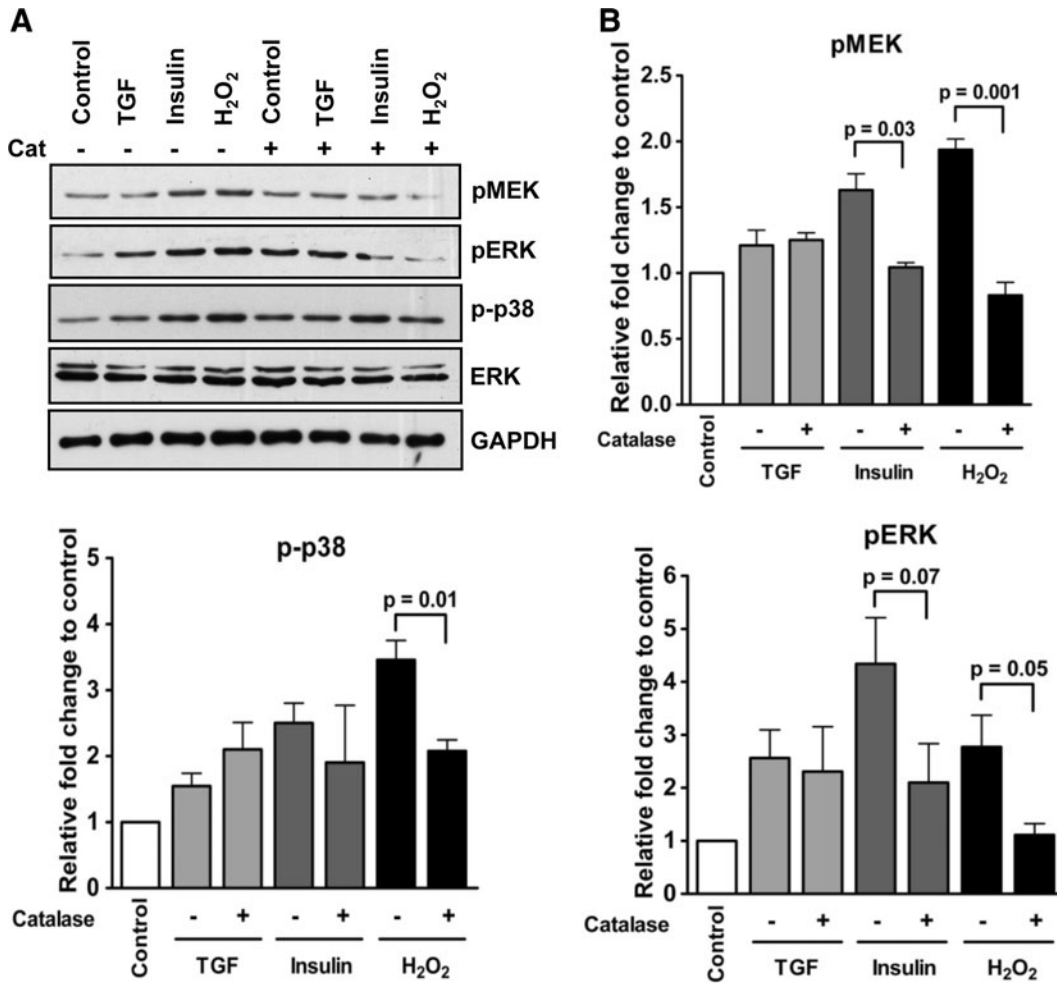

**SUPPLEMENTARY FIG. S5. ROS regulated the signaling responses of *A. gambiae* 4a3B cells to human insulin.** (A) 4a3B cells were stimulated with 6000 pg/ml human TGF- beta1, 1.7  $\mu$ M human insulin, or 500  $\mu$ M H<sub>2</sub>O<sub>2</sub> for 15 min. To determine the effect of ROS on signaling protein activation, cells were pretreated with 200 units/ml catalase for 40 min before each treatment. Blots are representative of three independent experiments. (B) Relative fold increases of pMEK, pERK, and p-p38 were normalized to total ERK (for pERK only) or GAPDH and are shown relative to PBS controls. Data are represented as means  $\pm$  SEMs from three independent experiments. Pairwise comparisons of treatments were analyzed by Student's *t*-test ( $\alpha=0.05$ ). Significant differences within treatment pairs are indicated. ROS, reactive oxygen species; TGF, transforming growth factor.

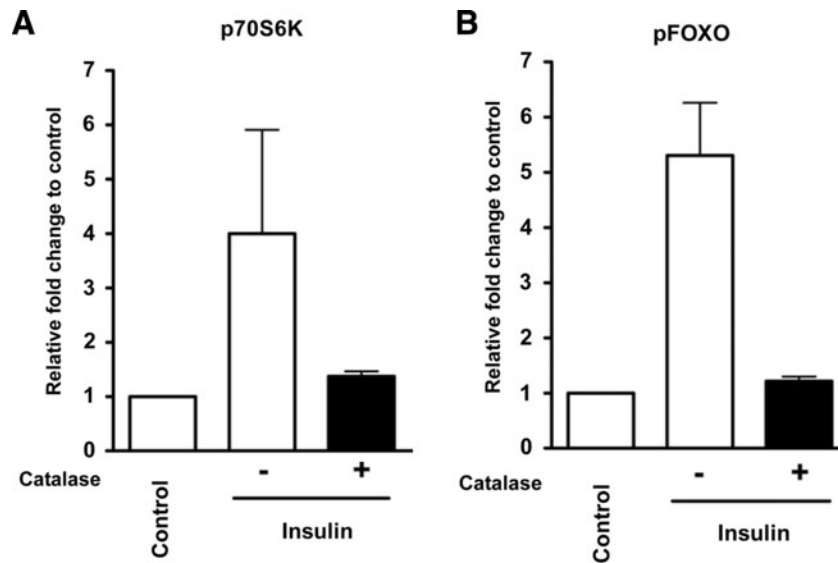

**SUPPLEMENTARY FIG. S6.** ROS regulated insulin-induced FOXO and p70S6K phosphorylation in *A. stephensi* cells. ASE cells were stimulated with  $1.7 \mu\text{M}$  human insulin with or without pretreatment with 200 units/ml catalase for 40 min before stimulation. Relative fold increases of **(A)** p70S6K and **(B)** pFOXO from Figure 6B and from one additional replicate were normalized to GAPDH and are shown relative to PBS controls. Data are represented as means  $\pm$  SEMs from two independent experiments.

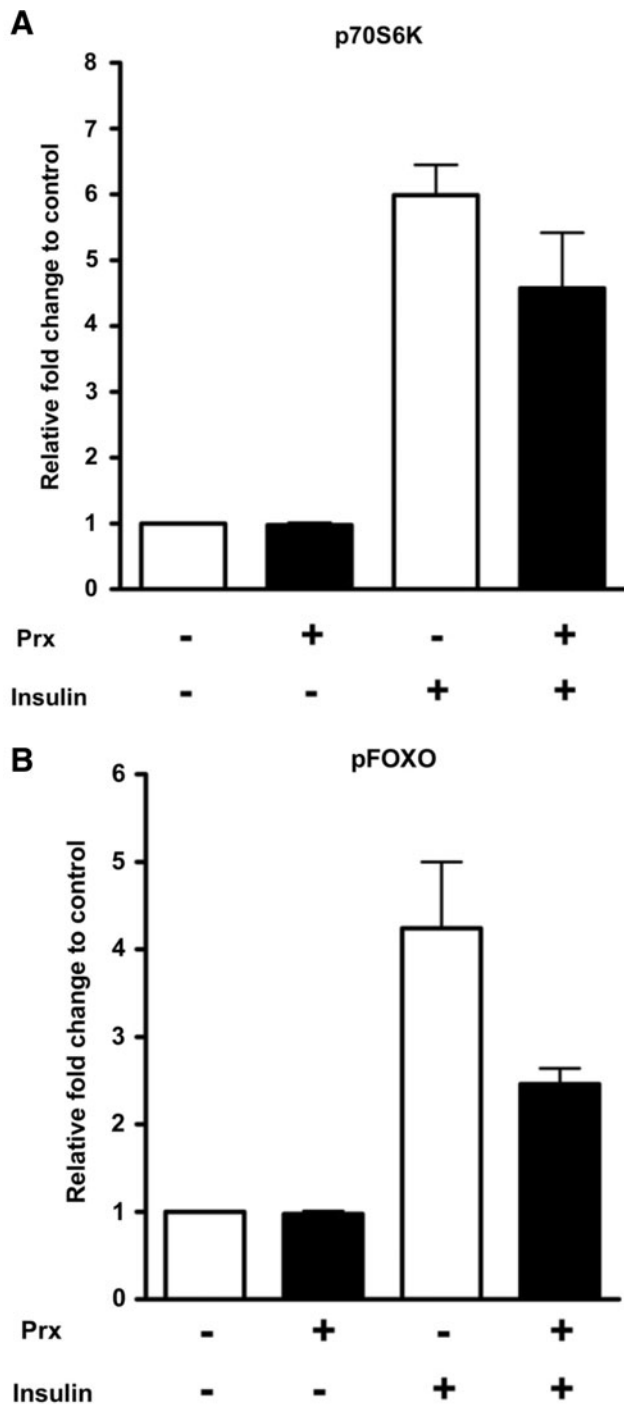

**SUPPLEMENTARY FIG. S7. Overexpression of *A. stevensii* 2-cys peroxiredoxin (*AsPrx*) reduced insulin signaling in ASE cells.** ASE cells were transfected with plasmid TLP-58 encoding a constitutively expressed *AsPrx* and were stimulated 1.7  $\mu$ M human insulin for 5 min (48). Cells overexpressing *AsPrx* are indicated as "Prx+," and cells transfected with the negative control plasmid TLP-55 are indicated as "Prx-." Relative fold increases of (A) p70S6K and (B) pFOXO from Figure 7D and from one additional replicate were normalized to GAPDH and are shown relative to PBS-treated control cells from Figure 7D. Data are represented as means  $\pm$  SEMs from two independent experiments.
